# Supplementary material
Source: PubMed Central journal article supplement (PMC1413696)
Supplement: pnas_0507527103_1.pdf [file pnas_0507527103_1.pdf]

## Nde I

AKmeso 1 CATATGAATCTGGTCTGATGGGCCTGCCGGGTGCGGGCAAAGGCACCCAGGGCGAACGT  
AKthermo 1 CATATGAATCTGGTCTGATGGGCCTGCCGGGTGCGGGCAAAGGCACCCAGGGCGGAAAAA  
\*\*\*\*\* \*\*

## EcoR I

AKmeso 61 ATTGTGGAAGATTATGGAATTCCGCATATTAGCACCGGCGATATGTTTCGTGCGGCGATG  
AKthermo 61 ATTGTGGCGGCGTATGGAATTCCGCATATTAGCACCGGCGATATGTTTCGTGCGGCGATG  
\*\*\*\*\* \* \*\*\*\*\*

AKmeso 121 AAAGAAGAAACCCCGCTGGGCCTGGAAGCGAAAAGCTATATTGATAAAGGCGAACCTGGTG  
AKthermo 121 AAAGAAGGCACCCCGCTGGGCCTGCAGGCGAAACAGTATATGGATCGTGGCGATCTGGTT  
\*\*\*\*\* \* \*\*\*\*\*

## BstE II

AKmeso 181 CCGGATGAGGTGACCATTGGCATTGTTAAAGAACGCTCTGGGCAAAGATGATTGCGAACGC  
AKthermo 181 CCGGATGAGGTGACCATTGGCATTGTTCCGCGAACGCTCTGAGCAAAGATGATTGCCAGAAC  
\*\*\*\*\* \* \*\*\*\*\*

AKmeso 241 GGCTTTCTGCTGGATGGCTTTCCGCGGACCGTTGCGCAGGCGGAAGCACTGGAAGAAATT  
AKthermo 241 GGCTTTCTGCTGGATGGCTTTCCGCGGACCGTTGCGCAGGCGGAAGCACTGGAACACCATG  
\*\*\*\*\* \*\*

## SnaB I

AKmeso 301 CTGGAAGAATACGGCAAACCGATTGATTACGTAATTAACATTGAAGTGGATAAAGATGTT  
AKthermo 301 CTGGCGGATATTGGCCGTAACCTGGATTACGTAATTCATATTGATGTGCGTCAGGATGTG  
\*\*\*\* \*\* \*\*\*\*\* \* \*\*\*\*\* \*\* \* \*\*\*\*\*

## Afe I

AKmeso 361 CTGATGGAGCGCTTAACCGGCCGTCGTATTTGCGAGCGTGTGCGGCACCACCTATCATCTG  
AKthermo 361 CTGATGGAGCGCTTAACCGGCCGTCGTATTTGCCGTAACCTGCGGCGCGACCTATCATCTG  
\*\*\*\*\* \* \*\*\*\*\*

AKmeso 421 GTGTTTAAACCCGCCGAAAACCCCGGGCATTGCGATAAAGATGGCGGCGAACTGTATCAG  
AKthermo 421 ATTTTTTCATCCGCCGAAAACCCCGGGCGTGTGCGATAAATGCGGCGGTGAACTGTATCAG  
\* \*\* \* \*\*\*\*\* \*\* \*\*\*\*\* \* \*\*\*\*\* \*\*\*\*\* \*\*\*\*\*

## BssH II

AKmeso 481 CGCGCGGATGATAACGAAGAAACCGTTAGCAAACGCTCTGGAAGTGAACATGAAACAGACC  
AKthermo 481 CGCGCGGATGATAACGAAGCGACCGTTGCGAACCGTCTGGAAGTGAACATGAAACAGATG  
\*\*\*\*\* \*\*\*\*\* \*\* \*\*\*\*\*

## Kpn I

AKmeso 541 CAGCCGCTGCTGGATTTTTATAGCGAAAAAGGTACCTGGCGAACGTTAACGGCCAGCAG  
AKthermo 541 AAACCGCTGGTTGATTTTTATGAACAGAAAAGGTACCTGCGTAACATTAACGGCGAACAG  
\* \*\*\*\*\* \* \*\*\*\*\* \* \*\*\*\*\* \*\* \*\*\*\*\* \* \*\*

AKmeso 601 GATATTCAGGATGTTTTATGCGGATGTTAAAGATCTGCTGGGCGGCCTGAAAAATAATAA  
AKthermo 601 GATATGGA AAAAGTTTTTTCGCGGATATTTCGCGAACTGCTGGGCGGCCTGGCGCGTTAATAA  
\*\*\*\*\* \* \* \*\*\*\*\* \*\*\*\*\* \* \* \*\*\*\*\* \*\*\*\*\*

## BamH I

AKmeso 661 GGATCC  
AKthermo 661 GGATCC  
\*\*\*\*\*
