# Supplementary material
Source: PubMed Central journal article supplement (PMC1413696)

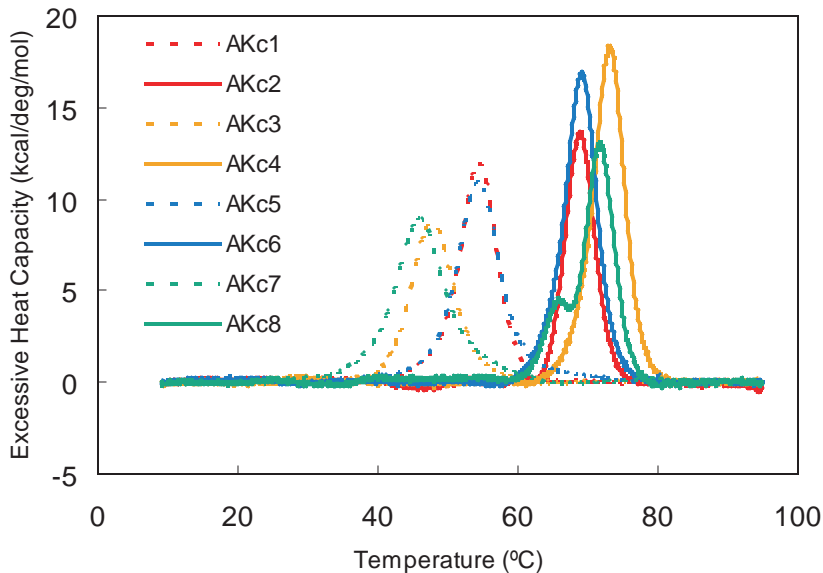

Supplement: pnas_0507527103_2.pdf [file pnas_0507527103_2.pdf]
